# Supplementary material
Source: PubMed Central journal article supplement (PMC4984282)
Supplement: AEM.00495-16_zam999117310so1.pdf [file AEM.00495-16_zam999117310so1.pdf]

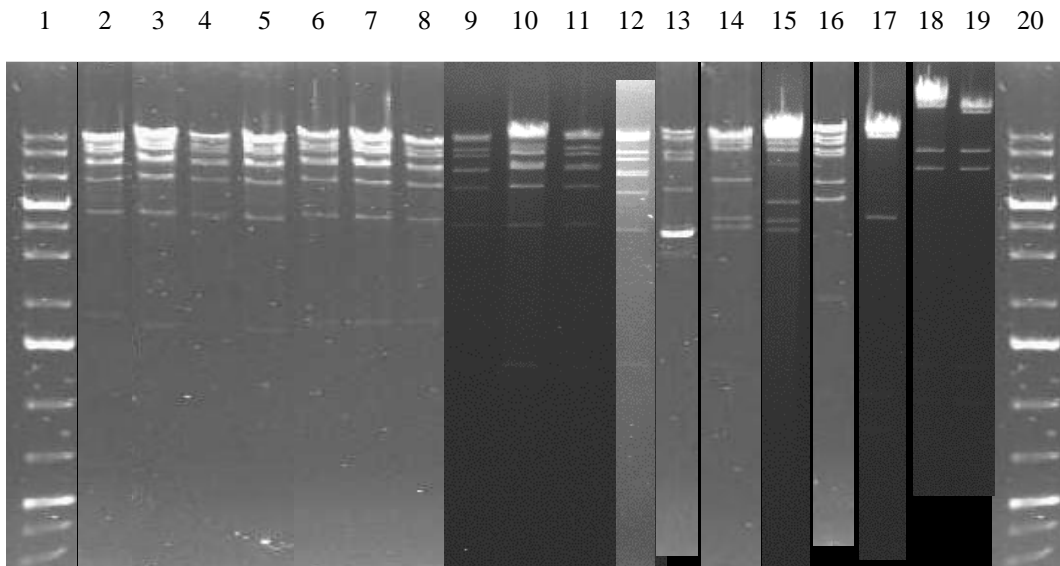

**Fig. S1 A:** RFLP of IncI1/*bla*<sub>CMY-2</sub> plasmids from *Escherichia coli* isolated from humans, animals and meat in Denmark. Lanes 1 and 20: marker 1 kb plus; lanes 2 – 19: *Bgl*III-digested plasmid DNA of isolate C-6, R1AC,R2AC, R3AC, R6AC, R7AC, R13AC, C-28397, C-29199, C-30029, C-30104, A1, C-4, C-21, C-9, C-24, C-28464, C-29870.

*Bgl*III-digested plasmid RFLP profiles: lane 2 – 12: profile a1; lane 13: profile a2; lane 14: profile c1; lane 15: profile c2; lane 16: profile d1; lane 17: profile e1; lane 18: profile f1; lane 19: profile g1.

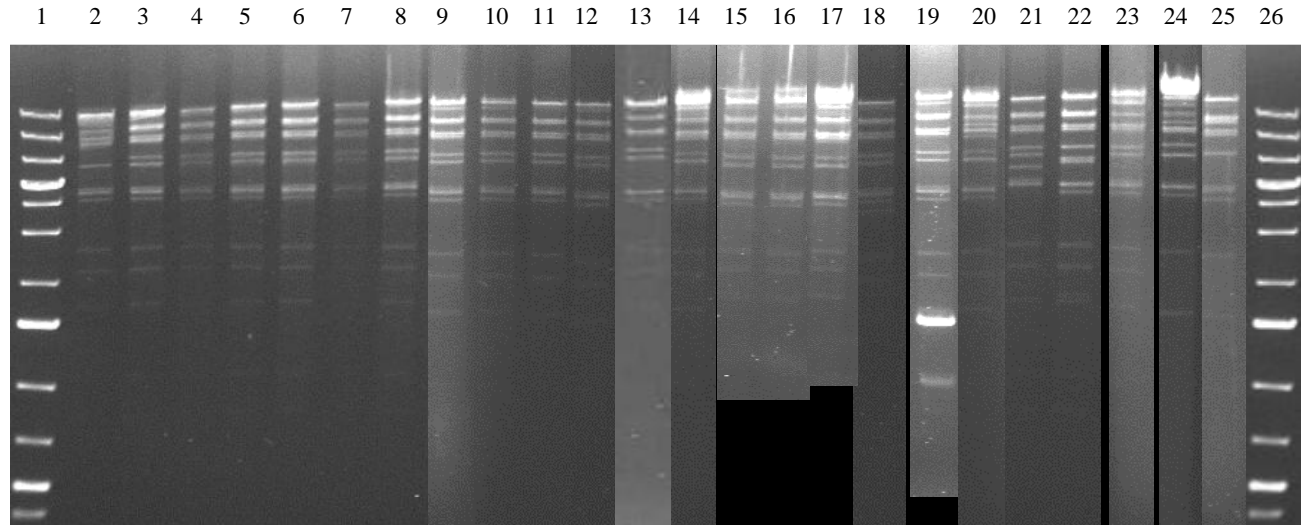

**Fig. S1 B:** RFLP of IncII/*bla*<sub>CMY-2</sub> plasmids from *Escherichia coli* isolated from humans, animals and meat in Denmark. Lanes 1 and 26: marker 1 kb plus; lanes 2 – 25: *Bgl*III-digested plasmid DNA of isolate C-20, C-22, 1061-1, 7077-63, 5498-4, 2067-2, 2054-7, 2028-4, 2028-7, 5499-28, 5498-25, C-24716, 2028-8, 5499-25, 7077-60, 2123-1, 2028-14, 5499-19, 2115-5, 2067-1, 2054-6, 2028-10, 7075-31, 2054-3.

*Bgl*III-digested plasmid RFLP profiles: lane 2; profile b2; lanes 3 – 14: profile b1; lanes 15 – 17: profile b3; lane 18: profile b4; lane 19: profile b5; lane 20: profile b6; lane 21: profile b7; lane 22: profile b8; lane 23: profile b9; lane 24: profile b10; lane 25: profile b11.

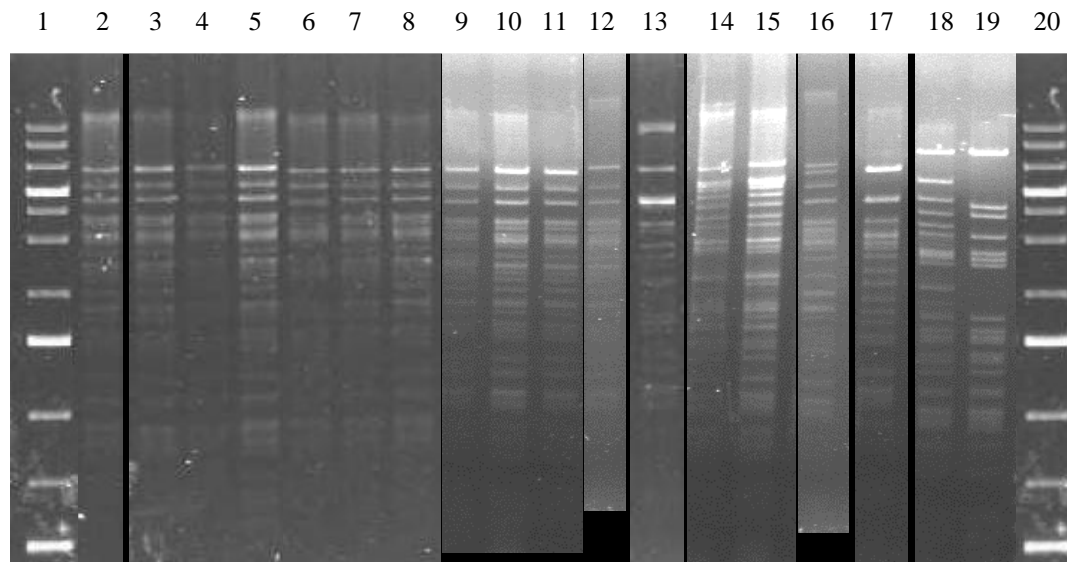

**Fig. S2 A:** RFLP of IncI1/*bla*<sub>CMY-2</sub> plasmids from *Escherichia coli* isolated from humans, animals and meat in Denmark. Lanes 1 and 20: marker 1 kb plus; lanes 2 – 19: *Pst*I-digested plasmid DNA of isolate C-6, R1AC, R2AC, R3AC, R6AC, R7AC, R13AC, C-28397, C-29199, C-30029, C-30104, A1, C-4, C-21, C-9, C-24, C-28464, C-29870.

*Pst*I-digested plasmid RFLP profiles: lane 2 – 12: profile a1; lane 13: profile a2; lane 14: profile c1; lane 15: profile c2; lane 16: profile d1; lane 17: profile e1; lane 18: profile f1; lane 19: profile g1.

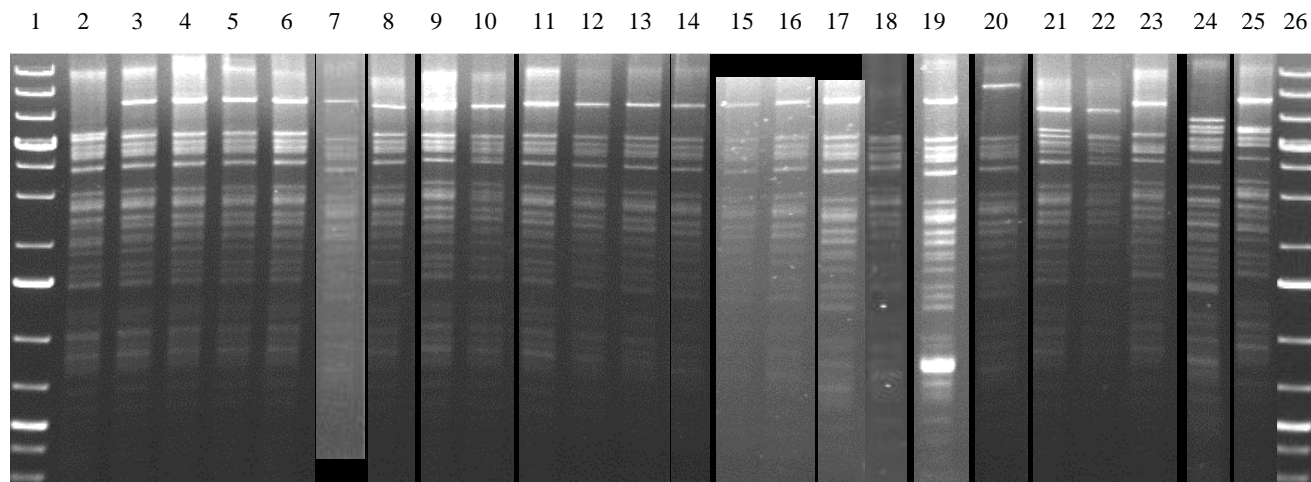

**Fig. S2 B:** RFLP of IncII/*bla*<sub>CMY-2</sub> plasmids from *Escherichia coli* isolated from humans, animals and meat in Denmark. Lanes 1 and 26: marker 1 kb plus; lanes 2 – 25: *Pst*I-digested plasmid DNA of isolate C-20, C-22, 1061-1, 7077-63, 5498-4, 2067-2, 2054-7, 2028-8, 2115-5, 2028-4, 2028-7, 5499-28, 5498-25, 5499-25, 7077-60, 2123-1, C-24716, 5499-19, 2028-14, 2067-1, 2054-6, 2028-10, 7075-31, 2054-3.

*Pst*I-digested plasmid RFLP profiles: lane 2; profile b2; lanes 3 – 18: profile b1; lane 19: profile b3; lane 20: profile b4; lane 21: profile b5; lane 22: profile b6; lane 23: profile b7; lane 24: profile b8; lane 25: profile b9.

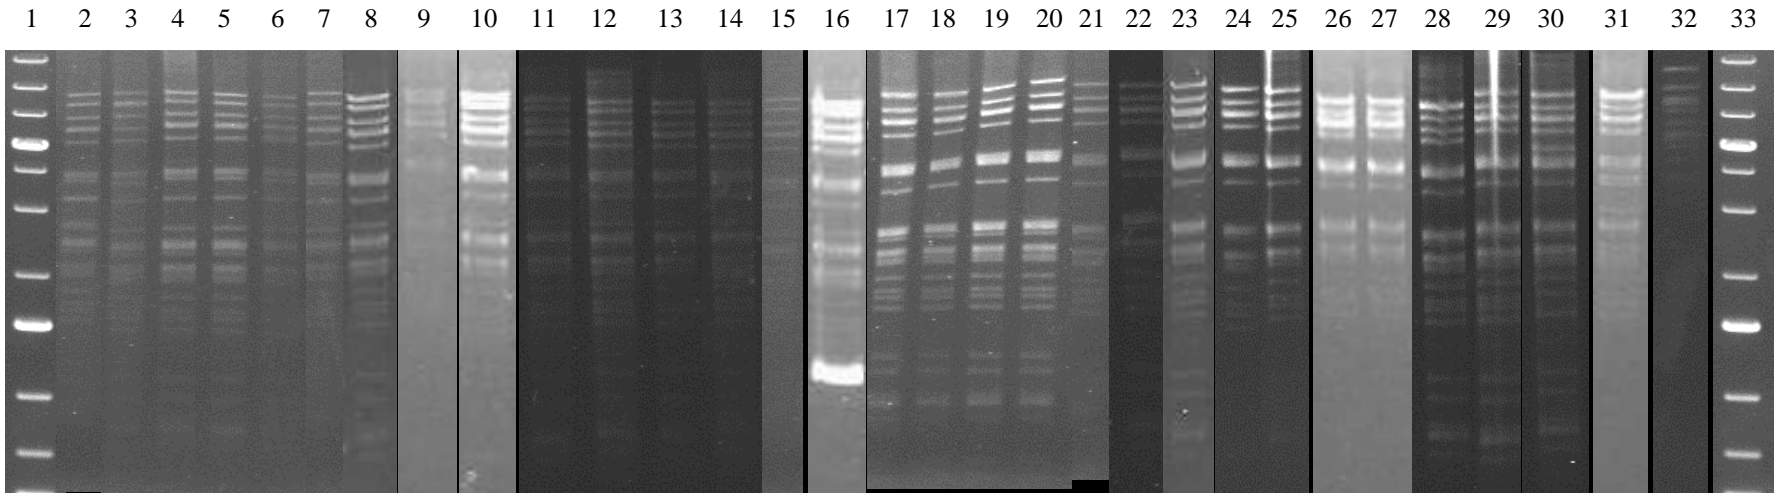

**Fig. S3:** RFLP of *IncK/bla<sub>CMY-2</sub>* plasmids from *Escherichia coli* isolated from humans, animals and meat in Denmark. Lanes 1 and 33: marker 1 kb plus; lanes 2 – 32: *EcoRV*-digested plasmid DNA of isolate C-12, C-8, 3786Z08, 3823Z08, 1967-1, 648-1, 885-01, 99-1, 2510-6, 1472-03, 2285-1, 131-1, 671, 637, 821-1, 5499-9, 7077-7, 2054-5, 2120-1, 7077-11, 131-4, 6870-55, 7077-57, 7075-19, 7075-4, 7622-28, 1239-2, 7625-26, 9832-4, 2075-10, 1184-1.

*EcoRV*-digested plasmid RFLP profiles: lanes 2 – 15: profile a1; lane 16: profile a2; lanes 17 – 30: profile b1; lane 31: profile c1; lane 32: profile d1.

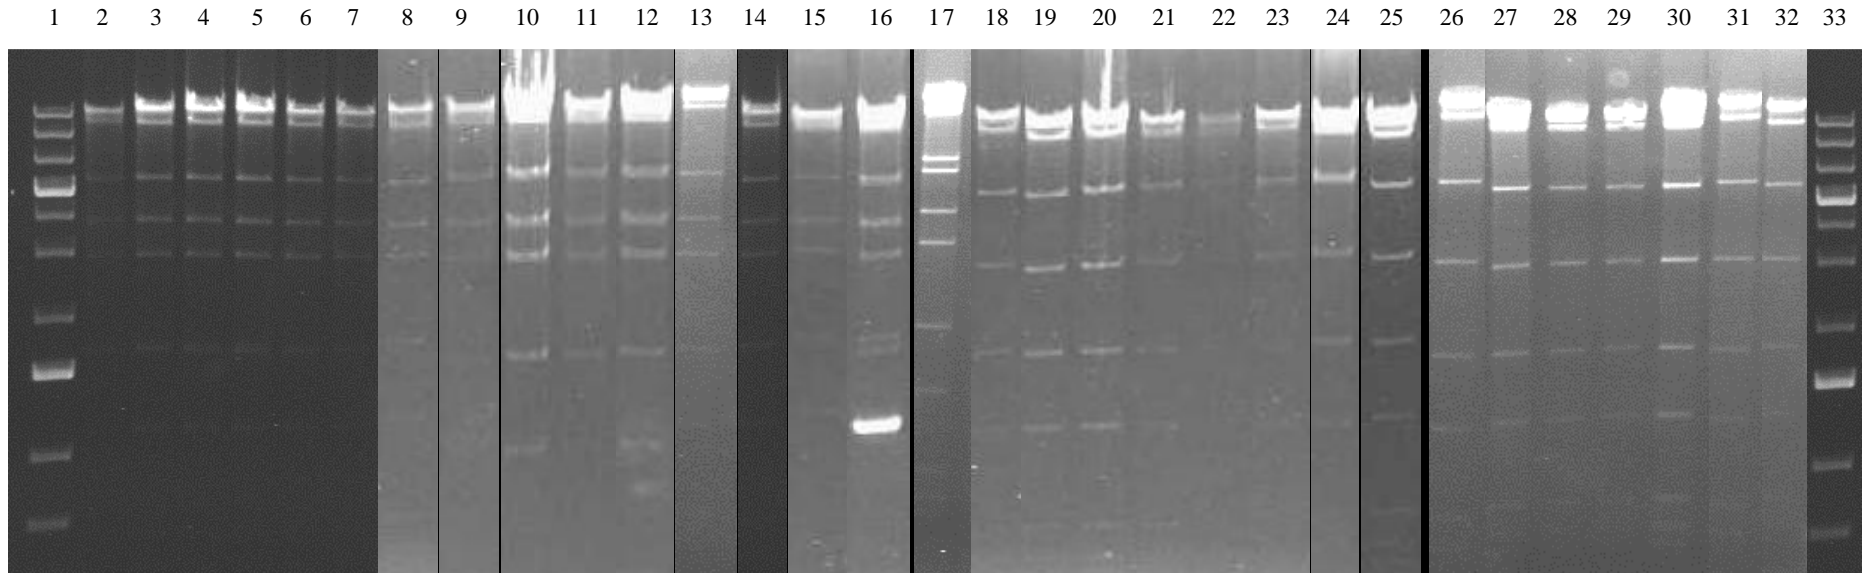

**Fig. S4:** RFLP of IncK/*bla*<sub>CMY-2</sub> plasmids from *Escherichia coli* isolated from humans, animals and meat in Denmark. Lanes 1 and 33: marker 1 kb plus; lanes 2 – 32: *SalI*-digested plasmid DNA of isolate C-8, C-12, 3786Z08, 3823Z08, 885-01, 2510-6, 1472-03, 99-1, 2285-1, 131-1, 1184-1, 1967-1, 637, 671, 821-1, 648-1, 1239-2, 7075-4, 7075-19, 7622-28, 7625-26, 9832-4, 2075-10, 6870-55, 131-4, 5499-9, 7077-7, 2054-5, 2120-1, 7077-11, 7077-57.

*SalI*-digested plasmid RFLP profiles: lanes 2 – 15: profile a1; lane 16: profile a2; lane 17: profile a3; lanes 18 – 32: profile b1.
